# Supplementary material
Source: HighWire-hosted journal article supplement (https://dmd.aspetjournals.org/highwire/filestream/75522/field_highwire_adjunct_files/0/64_supplemental_data_revised.pdf)
Supplement: 64_supplemental_data_revised.pdf [file 64_supplemental_data_revised.pdf]

#DMD-AR-2020-000064

**Comparison of In Vitro to In Vivo Extrapolation Approaches for Predicting  
Transporter-Mediated Hepatic Uptake Clearance Using Suspended Rat  
Hepatocytes**

Na Li, Akshay Badrinarayanan, Xingwen Li, John Roberts, Mike Hayashi, Manpreet Virk,  
Anshul Gupta\*

*Department of Pharmacokinetics and Drug Metabolism, Amgen Research, Amgen Inc.  
Cambridge, MA 02142*

\*Corresponding Author: Anshul Gupta

Address: Department of Pharmacokinetics and Drug Metabolism, Amgen Research, Amgen Inc.

360 Binney St., Cambridge, MA 02142

Phone: +1 (617) 444 5205

Email: [agupta.pharmaceuticals@gmail.com](mailto:agupta.pharmaceuticals@gmail.com)

Journal: Drug Metabolism and Disposition

The material includes Supplemental Table S1, Supplemental Methods and References.

## Supplemental Materials:

Table S1: Summary of the in vitro and in vivo evidence of OATP-mediated hepatic uptake of the selected compounds

| Compound     | Transporters involved in hepatic uptake |                                             |                                   | Preclinical and clinical evidence of OATP involvement |                                                          |                          |
|--------------|-----------------------------------------|---------------------------------------------|-----------------------------------|-------------------------------------------------------|----------------------------------------------------------|--------------------------|
|              | Approach                                | Hepatic Transporters                        | Reference                         | Approach                                              | PK Change                                                | Reference                |
| Rosuvastatin | RAF and REF                             | OATP1B1 (M) and OATP1B3 (total 96% and 80%) | (Kunze et al., 2014) <sup>a</sup> | oatp1a/1b KO mice                                     | i.v. : AUC↑ 1.7-fold<br>PO: Cmax ↑ 3-fold; AUC↑ 7.1-fold | (Iusuf et al., 2013)     |
|              | RAF                                     | OATP1B1(>95%) and OATP1B3 (<5%)             | (Izumi et al., 2018) <sup>b</sup> | oatp1a/1b KO mice                                     | i.v. : AUC↑ 2.3-fold<br>PO: Cmax ↑ 35-fold; AUC↑ 48-fold | (Salphati et al., 2014)  |
|              | Hepatocytes with inhibitor              | OATP1B1/1B3 (71%), 2B1 (21%) and NTCP (6%)  | (Bi et al., 2019)                 | Clinical DDI with rifampicin (RIF)                    | + 600 mg RIF: Cmax ↑ 5.2-fold; AUC↑ 2.5-fold             | (Mori et al., 2020)      |
| Pravastatin  | RAF and REF                             | OATP1B1 (M) and OATP1B3 (total 88% and 70%) | (Kunze et al., 2014) <sup>a</sup> | oatp1a/1b KO mice                                     | AUC↑ 4.3-fold                                            | (Higgins et al., 2014)   |
|              | RAF                                     | OATP1B1 (>95%) and OATP1B3 (<5%)            | (Izumi et al., 2018) <sup>b</sup> | oatp1a/1b KO mice                                     | i.v. AUC↑ 4-fold<br>PO: Cmax ↑ 9.7-fold; AUC↑ 18-fold    | (Salphati et al., 2014)  |
|              | Hepatocytes with inhibitor              | OATP1B1/1B3 (98%)                           | (Bi et al., 2019)                 | Clinical DDI with cyclosporin A (CsA)                 | + 2x 100 mg CsA: Cmax ↑ 3.2-fold; AUC↑ 3.4-fold          | (Yee et al., 2019)       |
| Valsartan    | RAF                                     | OATP1B1 (20-70%) and 1B3 (30-80%)           | (Yamashiro et al., 2006)          | Clinical DDI with RIF                                 | + 600 mg RIF: Cmax ↑ 3.7-fold; AUC↑ 5.5-fold             | (Mori et al., 2020)      |
|              | RAF                                     | OATP1B1 (>75%) and 1B3 (<25%)               | (Izumi et al., 2018) <sup>b</sup> |                                                       |                                                          |                          |
| Pitavastatin | RAF                                     | OATP1B1 (90%) and OATP1B3 (10%)             | (Hirano et al., 2004)             | oatp1a/1b KO mice                                     | PO: Cmax ↑ 13.5-fold; AUC↑ 11.7-fold                     | (Salphati et al., 2014)  |
|              | RAF and REF                             | OATP1B1 (M) and OATP1B3 (total 43% and 35%) | (Kunze et al., 2014) <sup>a</sup> | oatp1a/1b KO mice                                     | i.v.: AUC↑ 3.7-fold                                      | (Chang et al., 2019)     |
|              | RAF                                     | OATP1B1 (>90%) and OATP1B3 (<10%)           | (Izumi et al., 2018) <sup>b</sup> | Clinical DDI with RIF                                 | + 600 mg RIF: Cmax ↑ 3.7-fold; AUC↑ 4.0-fold             | (Mori et al., 2020)      |
| Fluvastatin  | Hepatocytes: inhibitor                  | OATP1B1/1B3 (81%), 2B1 (12%)                | (Bi et al., 2019)                 |                                                       |                                                          |                          |
|              | RAF and REF                             | OATP1B1 (M) and OATP1B3 (total 50% and 42%) | (Kunze et al., 2014) <sup>a</sup> | oatp1a/1b KO mice                                     | i.v.: AUC↑ 1.7-fold                                      | (Chang et al., 2019)     |
| Cerivastatin | RAF                                     | OATP1B1 (>93%) and OATP1B3 (<7%)            | (Izumi et al., 2018) <sup>b</sup> |                                                       |                                                          |                          |
|              | RAF and REF                             | OATP1B1 (M) and OATP1B3 (total 19% and 16%) | (Kunze et al., 2014) <sup>a</sup> | Clinical DDI with CsA                                 | AUC↑ 3.8-fold                                            | (Shitara et al., 2013)   |
| Nateglinide  | RAF                                     | OATP1B1 (>95%) and OATP1B3 (<5%)            | (Izumi et al., 2018) <sup>b</sup> | Clinical DDI with fluconazole                         | AUC↑ 1.5-fold                                            | (Niemi et al., 2003)     |
| Atorvastatin | RAF and REF                             | OATP1B1 (M) and OATP1B3 (total 73% and 63%) | (Kunze et al., 2014) <sup>a</sup> | oatp1a/1b KO mice                                     | AUC↑ 19-fold                                             | (Higgins et al., 2014)   |
|              | RAF                                     | OATP1B1 (>85%) and 1B3(<15%)                | (Izumi et al., 2018) <sup>b</sup> | Clinical DDI with RIF                                 | + 600 mg RIF: Cmax ↑ 13.3-fold; AUC↑ 7.3-fold            | (Mori et al., 2020)      |
| Bosentan     | RAF                                     | OATP1B1 (>90%) and 1B3 (<10%)               | (Izumi et al., 2018) <sup>b</sup> | Clinical DDI with RIF                                 | + 600 mg RIF: AUC↑ 3.2-fold                              | (Yoshikado et al., 2017) |
| Glyburide    | RAF                                     | OATP1B1 (>95%) and 1B3 (<5%)                | (Izumi et al., 2018) <sup>b</sup> | Clinical DDI with RIF                                 | + 600 mg RIF: AUC↑ 2.2-fold                              | (Shitara et al., 2013)   |
| Asunaprevir  | Hepatocytes                             | Saturable Uptake                            | (Eley et al., 2015)               | Clinical DDI with rifampin                            | PO: Cmax ↑ 21-fold; AUC↑ 15-fold                         | (Eley et al., 2015)      |
| Telmisartan  | RAF                                     | OATP1B3 only                                | (Ishiguro et al., 2006)           | Clinical DDI with Nisoldipine                         | AUC↑ 2.3-fold                                            | (Bajcetic et al., 2007)  |
|              | RAF                                     | OATP1B3 only                                | (Izumi et al., 2018) <sup>b</sup> |                                                       |                                                          |                          |

<sup>a</sup>In Kunze, et al, the percent contribution of both OATP1B1 and OATP1B3 to the total active hepatic uptake clearance determined using RAF and REF respectively were listed in the parentheses. M in the parentheses indicated the major OATP involved in hepatic uptake.

<sup>b</sup>The percent contribution (%) cited from Izumi, et al and others represents the relative contribution of OATP1B1 and OATP1B3 to hepatic uptake.

RIF: rifampicin

CsA: cyclosporin A

## **Supplemental methods:**

### **Bioanalysis using RapidFire**

Analysis of specimens for intrinsic metabolic CL in rat hepatocytes was performed using the RapidFire 365 high-throughput SPE system interfaced with a 6550 QTOF mass spectrometer with dual Agilent Jet (AJS) ESI source (Agilent Technologies, Santa Clara, CA, USA). The instrument settings were gas temperature at 200°C, drying gas at 18 l/min, nebulizer 40 psig, sheath gas temperature at 350°C, sheath gas flow at 12 l/min and Vcap at 5000 V. The acquisition rate/time was 5 spectra/s and Mass range was 100 to 700 m/z. Specimens were analyzed in positive mode. The load/wash solvent (solvent A) was water containing 0.1% (v/v) formic acid. The elution solvent (solvent B) was acetonitrile containing 0.1% (v/v) formic acid. Specimens were aspirated serially, under vacuum, directly from multi-well assay plates. In each case, a 10 µL aliquot was loaded onto a C18 SPE cartridge (cartridge type A) to remove buffer salts, using solvent A at a flow rate of 1.5 ml/min for 3500 ms. The retained and purified analytes were eluted to the mass spectrometer by washing the cartridge with solvent B at 0.60 to 0.8 ml/min for 3500 ms. The cartridge was re-equilibrated with solvent A for 500 ms at 1.5 ml/min. The entire sampling cycle was around 8 s per well, enabling the analysis of a 96-well plate in approximately 13 min.

### **LC-MS/MS Quantification**

The Shimadzu LC system included two LC-20ADXR pumps, a SIL-30ACMP auto sampler, a CBM-20A controller and a CTO-20A column oven (Shimadzu, USA). The chromatography was performed using C18 column (Cadenza 5CD - C18, 5 µM, 2 X 30mm, Imtakt, USA). Sample injection volume was 5µL and the LC flow rate was 1.2 mL/min. Mobile phase (A) was water with 0.1% formic acid and mobile phase (B) was acetonitrile with 0.1% formic acid. The gradient elution started with a 0.1 min hold at 5% mobile phase (B), followed by a 0.8 min ramp to 95% mobile phase (B) and hold for 0.5 min, followed by a 0.1 min ramp to 5% mobile phase (B) and a hold for 0.4 min re-equilibration. Integrated valco valve was used and the injected liquid was directed into Mass Spectrometer from 0.3 min to 1.8 min. The triple-quadrupole instrument is an AB Sciex 5500 QTrap. The mass spectrometer and peripherals were all controlled by Analyst™ (version 1.6.3; AB Sciex, Ontario, Canada) and DiscoveryQuant™

software (version 3.0.1; AB Sciex, Ontario, Canada). Positive ionizations were used in selected reaction monitoring (MRM) scan mode. All the transitions of twelve compounds are listed below.

| Compound     | MW  | Q1    | Q3    | DP  | CE | CPX | EP |
|--------------|-----|-------|-------|-----|----|-----|----|
| Glyburide    | 494 | 495.2 | 370.1 | 73  | 10 | 9   | 8  |
| Nateglinide  | 317 | 318.2 | 69.1  | 120 | 25 | 13  | 12 |
| Valsartan    | 435 | 436.2 | 291.1 | 43  | 10 | 13  | 12 |
| Telmisartan  | 514 | 515.0 | 276.1 | 162 | 50 | 13  | 2  |
| Atorvastatin | 558 | 559.4 | 440.3 | 81  | 10 | 16  | 10 |
| Asunaprevir  | 747 | 748.3 | 648.3 | 60  | 27 | 17  | 5  |
| Pitavastatin | 421 | 422.5 | 290.2 | 96  | 39 | 10  | 10 |
| Bosentan     | 551 | 551.8 | 202.0 | 154 | 25 | 15  | 2  |
| Rosuvastatin | 481 | 482.0 | 258.1 | 76  | 28 | 20  | 10 |
| Cerivastatin | 459 | 460.2 | 356.3 | 86  | 20 | 12  | 10 |
| Fluvastatin  | 411 | 412.3 | 224.1 | 71  | 30 | 22  | 10 |
| Pravastatin  | 446 | 447.1 | 327.4 | 50  | 23 | 30  | 10 |

## References

- Bajcetic M, Benndorf RA, Appel D, Schwedhelm E, Schulze F, Riekhof D, Maas R and Boger RH (2007) Pharmacokinetics of oral doses of telmisartan and nisoldipine, given alone and in combination, in patients with essential hypertension. *J Clin Pharmacol* **47**:295-304.
- Bi YA, Costales C, Mathialagan S, West M, Eatemadpour S, Lazzaro S, Tylaska L, Scialis R, Zhang H, Umland J, Kimoto E, Tess DA, Feng B, Tremaine LM, Varma MVS and Rodrigues AD (2019) Quantitative Contribution of Six Major Transporters to the Hepatic Uptake of Drugs: "SLC-Phenotyping" Using Primary Human Hepatocytes. *J Pharmacol Exp Ther* **370**:72-83.
- Chang JH, Zhang X, Messick K, Chen YC, Chen E, Cheong J and Ly J (2019) Unremarkable impact of Oatp inhibition on the liver concentration of fluvastatin, lovastatin and pitavastatin in wild-type and Oatp1a/1b knockout mouse. *Xenobiotica* **49**:602-610.
- Eley T, Han YH, Huang SP, He B, Li W, Bedford W, Stonier M, Gardiner D, Sims K, Rodrigues AD and Bertz RJ (2015) Organic anion transporting polypeptide-mediated transport of, and inhibition by, asunaprevir, an inhibitor of hepatitis C virus NS3 protease. *Clin Pharmacol Ther* **97**:159-166.
- Higgins JW, Bao JQ, Ke AB, Manro JR, Fallon JK, Smith PC and Zamek-Gliszczynski MJ (2014) Utility of Oatp1a/1b-knockout and OATP1B1/3-humanized mice in the study of OATP-mediated pharmacokinetics and tissue distribution: case studies with pravastatin, atorvastatin, simvastatin, and carboxydichlorofluorescein. *Drug Metab Dispos* **42**:182-192.
- Hirano M, Maeda K, Shitara Y and Sugiyama Y (2004) Contribution of OATP2 (OATP1B1) and OATP8 (OATP1B3) to the hepatic uptake of pitavastatin in humans. *J Pharmacol Exp Ther* **311**:139-146.
- Ishiguro N, Maeda K, Kishimoto W, Saito A, Harada A, Ebner T, Roth W, Igarashi T and Sugiyama Y (2006) Predominant contribution of OATP1B3 to the hepatic uptake of telmisartan, an angiotensin II receptor antagonist, in humans. *Drug Metab Dispos* **34**:1109-1115.
- Iusuf D, van Esch A, Hobbs M, Taylor M, Kenworthy KE, van de Steeg E, Wagenaar E and Schinkel AH (2013) Murine Oatp1a/1b uptake transporters control rosuvastatin systemic exposure without affecting its apparent liver exposure. *Mol Pharmacol* **83**:919-929.
- Izumi S, Nozaki Y, Kusuhara H, Hotta K, Mochizuki T, Komori T, Maeda K and Sugiyama Y (2018) Relative Activity Factor (RAF)-Based Scaling of Uptake Clearance Mediated by Organic Anion Transporting Polypeptide (OATP) 1B1 and OATP1B3 in Human Hepatocytes. *Mol Pharm* **15**:2277-2288.
- Kunze A, Huwyler J, Camenisch G and Poller B (2014) Prediction of organic anion-transporting polypeptide 1B1- and 1B3-mediated hepatic uptake of statins based on transporter protein expression and activity data. *Drug Metab Dispos* **42**:1514-1521.
- Mori D, Kimoto E, Rago B, Kondo Y, King-Ahmad A, Ramanathan R, Wood LS, Johnson JG, Le VH, Vourvahis M, David Rodrigues A, Muto C, Furihata K, Sugiyama Y and Kusuhara H (2020) Dose-Dependent Inhibition of OATP1B by Rifampicin in Healthy Volunteers: Comprehensive Evaluation of Candidate Biomarkers and OATP1B Probe Drugs. *Clin Pharmacol Ther* **107**:1004-1013.
- Niemi M, Neuvonen M, Juntti-Patinen L, Backman JT and Neuvonen PJ (2003) Effect of fluconazole on the pharmacokinetics and pharmacodynamics of nateglinide. *Clin Pharmacol Ther* **74**:25-31.
- Salphati L, Chu X, Chen L, Prasad B, Dallas S, Evers R, Mamaril-Fishman D, Geier EG, Kehler J, Kunta J, Mezler M, Laplanche L, Pang J, Rode A, Soars MG, Unadkat JD, van Waterschoot RA, Yabut J, Schinkel AH and Scheer N (2014) Evaluation of organic anion transporting polypeptide 1B1 and 1B3 humanized mice as a translational model to study the pharmacokinetics of statins. *Drug Metab Dispos* **42**:1301-1313.
- Shitara Y, Maeda K, Ikejiri K, Yoshida K, Horie T and Sugiyama Y (2013) Clinical significance of organic anion transporting polypeptides (OATPs) in drug disposition: their roles in hepatic clearance and intestinal absorption. *Biopharm Drug Dispos* **34**:45-78.

- Yamashiro W, Maeda K, Hirouchi M, Adachi Y, Hu Z and Sugiyama Y (2006) Involvement of transporters in the hepatic uptake and biliary excretion of valsartan, a selective antagonist of the angiotensin II AT1-receptor, in humans. *Drug Metab Dispos* **34**:1247-1254.
- Yee SW, Giacomini MM, Shen H, Humphreys WG, Horng H, Brian W, Lai Y, Kroetz DL and Giacomini KM (2019) Organic Anion Transporter Polypeptide 1B1 Polymorphism Modulates the Extent of Drug-Drug Interaction and Associated Biomarker Levels in Healthy Volunteers. *Clin Transl Sci* **12**:388-399.
- Yoshikado T, Maeda K, Furihata S, Terashima H, Nakayama T, Ishigame K, Tsunemoto K, Kusuhara H, Furihata KI and Sugiyama Y (2017) A Clinical Cassette Dosing Study for Evaluating the Contribution of Hepatic OATPs and CYP3A to Drug-Drug Interactions. *Pharm Res* **34**:1570-1583.
